# Supplementary material for: Shift Workers Have Higher Blood Pressure Medicine Use, But Only When They Are Short Sleepers: A Longitudinal UK Biobank Study
Source: PubMed Central journal article supplement — J Am Heart Assoc. 2019 Oct 4;8(20):e013269. doi: 10.1161/JAHA.119.013269 (PMC6818048; doi:10.1161/jaha.119.013269), 2019-10-04
Supplement: JAH3-8-e013269-s001.pdf [file JAH3-8-e013269-s001.pdf]

# **SUPPLEMENTAL MATERIAL**

**Table S1. Model results for BP medication use at 5YFU regressed on the interaction of 3-level sleep duration and shift work and their main effects (N=9,200).**

| <i>Variable</i>                  | <i>OR#</i> | <i>95% CI</i> | <i>P-value</i> |
|----------------------------------|------------|---------------|----------------|
| Shift Work                       |            |               |                |
| Shift Work                       | 0.78       | 0.51-1.18     | 0.24           |
| No Shift Work                    | REF        | REF           | REF            |
| Sleep Duration                   |            |               |                |
| Short                            | 0.98       | 0.79-1.22     | 0.88           |
| Adequate                         | REF        | REF           | REF            |
| Long                             | 0.87       | 0.58-1.28     | 0.47           |
| Sleep Duration x Shift Work      |            |               |                |
| Short Sleep – Shift Work         | 2.49       | 1.27-4.86     | 0.01**         |
| Adequate Sleep – No Shift Work   | REF        | REF           | REF            |
| Long Sleep – Shift Work          | 0.74       | 0.09-6.03     | 0.78           |
| Age (years)                      | 1.06       | 1.04-1.08     | <0.001**       |
| Sex                              |            |               |                |
| Female                           | REF        | REF           |                |
| Male                             | 1.93       | 1.61-2.31     | <0.001**       |
| Race/Ethnicity                   |            |               |                |
| Mixed/Other                      | 1.13       | 0.40-3.18     | 0.82           |
| Asian                            | 1.36       | 0.57-3.24     | 0.49           |
| Black                            | 2.69       | 0.91-7.89     | 0.07           |
| White                            | REF        | REF           |                |
| Education                        |            |               |                |
| Attended College                 | 0.82       | 0.69-0.97     | 0.02*          |
| No College                       | REF        | REF           |                |
| Employment Status                |            |               |                |
| Employed                         | 0.99       | 0.63-1.53     | 0.95           |
| Retired                          | 0.92       | 0.58-1.46     | 0.72           |
| Not Employed/Not Retired         | REF        | REF           |                |
| Residence                        |            |               |                |
| Urban                            | REF        | REF           |                |
| Rural                            | 0.90       | 0.70-1.15     | 0.39           |
| Family History of CVD            |            |               |                |
| Yes                              | 1.28       | 1.08-1.52     | 0.005**        |
| No                               | REF        | REF           |                |
| Do not know/Prefer not to answer | 1.75       | 0.59-5.25     | 0.32           |
| Depression Status                |            |               |                |
| Yes                              | 1.62       | 1.03-2.55     | 0.04*          |
| No                               | REF        | REF           |                |
| Unknown                          | 1.46       | 1.12-1.92     | 0.006**        |
| Alcohol Frequency Intake         |            |               |                |
| Daily or almost daily            | 0.82       | 0.62-1.10     | 0.19           |
| Three or four times a week       | 0.77       | 0.58-1.02     | 0.07           |
| Once or twice a week             | 0.64       | 0.48-0.86     | 0.003**        |
| One to three times a month       | 0.69       | 0.48-0.99     | 0.04*          |
| Special occasions only/Never     | REF        | REF           |                |
| Physical Activity                |            |               |                |
| Ideal                            | 0.71       | 0.08-5.98     | 0.75           |
| Intermediate                     | 0.82       | 0.10-6.94     | 0.86           |
| Poor                             | REF        | REF           |                |
| Do not know/Prefer not to answer | 0.61       | 0.07-5.53     | 0.66           |
| Diet                             |            |               |                |
| Ideal                            | 2.00       | 0.24-16.48    | 0.52           |

|                       |                                  |      |           |          |
|-----------------------|----------------------------------|------|-----------|----------|
|                       | Intermediate                     | 1.01 | 0.85-1.20 | 0.91     |
|                       | Poor                             | REF  | REF       |          |
| Tobacco Use           |                                  |      |           |          |
|                       | Ideal                            | 0.79 | 0.56-1.12 | 0.18     |
|                       | Intermediate                     | 0.86 | 0.60-1.23 | 0.40     |
|                       | Poor                             | REF  | REF       |          |
|                       | Do not know/Prefer not to answer | 0.73 | 0.09-6.14 | 0.78     |
| Body Mass Index (BMI) |                                  |      |           |          |
|                       | Ideal                            | 0.29 | 0.22-0.39 | <0.001** |
|                       | Intermediate                     | 0.51 | 0.42-0.61 | <0.001** |
|                       | Poor                             | REF  | REF       |          |

---

‡ Model was adjusted for baseline age, sex, race/ethnicity, education, employment status, urban/rural residence, family history of CVD, depression status, alcohol frequency intake, physical activity, diet, tobacco use, and body mass index.

BP=blood pressure, REF=reference category, OR=odds ratio, CI=confidence interval

\*  $p < 0.05$ , \*\*  $p < 0.01$

**Table S2. Model results for BP medication use at 5YFU regressed on the interaction of circadian preference and shift work and their main effects (N=9,200).**

| <i>Variable</i>                   | <i>OR#</i> | <i>95% CI</i> | <i>P-value</i> |
|-----------------------------------|------------|---------------|----------------|
| Shift Work                        |            |               |                |
| Shift Work                        | 0.80       | 0.51-1.25     | 0.32           |
| No Shift Work                     | REF        | REF           | REF            |
| Circadian Preference              |            |               |                |
| Morning                           | 0.97       | 0.79-1.19     | 0.74           |
| Intermediate                      | REF        | REF           | REF            |
| Evening                           | 1.05       | 0.77-1.44     | 0.75           |
| Circadian Preference x Shift Work |            |               |                |
| Morning – Shift Work              | 2.05       | 1.02-4.13     | 0.04*          |
| Intermediate – No Shift Work      | REF        | REF           | REF            |
| Evening – Shift Work              | 1.26       | 0.47-3.40     | 0.65           |
| Age (years)                       | 1.06       | 1.04-1.08     | <0.001**       |
| Sex                               |            |               |                |
| Female                            | REF        | REF           |                |
| Male                              | 1.92       | 1.61-2.29     | <0.001**       |
| Race/Ethnicity                    |            |               |                |
| Mixed/Other                       | 1.10       | 0.39-3.08     | 0.86           |
| Asian                             | 1.43       | 0.60-3.41     | 0.42           |
| Black                             | 2.90       | 0.99-8.48     | 0.05           |
| White                             | REF        |               |                |
| Education                         |            |               |                |
| Attended College                  | 0.81       | 0.68-0.97     | 0.02*          |
| No College                        | REF        | REF           |                |
| Employment Status                 |            |               |                |
| Employed                          | 1.00       | 0.65-1.55     | 0.99           |
| Retired                           | 0.93       | 0.58-1.47     | 0.75           |
| Not Employed/Not Retired          | REF        | REF           |                |
| Residence                         |            |               |                |
| Urban                             | REF        | REF           |                |
| Rural                             | 0.90       | 0.71-1.16     | 0.42           |
| Family History of CVD             |            |               |                |
| Yes                               | 1.28       | 1.08-1.52     | 0.005**        |
| No                                | REF        | REF           |                |
| Do not know/Prefer not to answer  | 1.83       | 0.61-5.47     | 0.28           |
| Depression Status                 |            |               |                |
| Yes                               | 1.62       | 1.03-2.54     | 0.04*          |
| No                                | REF        | REF           |                |
| Unknown                           | 1.46       | 1.12-1.92     | 0.006**        |
| Alcohol Frequency Intake          |            |               |                |
| Daily or almost daily             | 0.83       | 0.62-1.11     | 0.21           |
| Three or four times a week        | 0.77       | 0.59-1.02     | 0.07           |
| Once or twice a week              | 0.65       | 0.48-0.86     | 0.003**        |
| One to three times a month        | 0.70       | 0.49-0.99     | 0.046*         |
| Special occasions only/Never      | REF        | REF           |                |
| Physical Activity                 |            |               |                |
| Ideal                             | 0.70       | 0.08-5.89     | 0.74           |
| Intermediate                      | 0.81       | 0.10-6.82     | 0.85           |
| Poor                              | REF        | REF           |                |
| Do not know/Prefer not to answer  | 0.60       | 0.07-5.44     | 0.65           |
| Diet                              |            |               |                |
| Ideal                             | 2.02       | 0.25-16.68    | 0.51           |



**Table S3. Relationship between shift work and the odds of new BP medication use at 5YFU among short sleepers (N=1,899).**

| <i>Variable</i>                  | <i>OR#</i> | <i>95% CI</i> | <i>P-value</i> |
|----------------------------------|------------|---------------|----------------|
| Shift Work                       |            |               |                |
| Shift Work                       | 2.08       | 1.21-3.58     | 0.008*         |
| No Shift Work                    | REF        | REF           | REF            |
| Age (years)                      | 1.05       | 1.02-1.08     | 0.003**        |
| Sex                              |            |               |                |
| Female                           | REF        | REF           |                |
| Male                             | 1.85       | 1.28-2.67     | 0.001**        |
| Race/Ethnicity                   |            |               |                |
| Mixed/Other                      | 2.34       | 0.58-9.42     | 0.23           |
| Asian                            | 0.99       | 0.25-4.01     | 0.99           |
| Black                            | 1.66       | 0.26-10.63    | 0.59           |
| White                            | REF        | REF           |                |
| Education                        |            |               |                |
| Attended College                 | 1.10       | 0.77-1.59     | 0.59           |
| No College                       | REF        | REF           |                |
| Employment Status                |            |               |                |
| Employed                         | 0.97       | 0.42-2.28     | 0.95           |
| Retired                          | 0.90       | 0.36-2.27     | 0.83           |
| Not Employed/Not Retired         | REF        | REF           |                |
| Residence                        |            |               |                |
| Urban                            | REF        | REF           |                |
| Rural                            | 0.70       | 0.39-1.25     | 0.23           |
| Family History of CVD            |            |               |                |
| Yes                              | 1.15       | 0.81-1.64     | 0.45           |
| No                               | REF        | REF           |                |
| Do not know/Prefer not to answer | 1.48       | 0.23-9.51     | 0.68           |
| Depression Status                |            |               |                |
| Yes                              | 1.43       | 0.57-3.57     | 0.44           |
| No                               | REF        | REF           |                |
| Unknown                          | 1.25       | 0.73-2.15     | 0.41           |
| Alcohol Frequency Intake         |            |               |                |
| Daily or almost daily            | 0.75       | 0.43-1.33     | 0.33           |
| Three or four times a week       | 0.57       | 0.33-1.00     | 0.05           |
| Once or twice a week             | 0.49       | 0.27-0.87     | 0.01*          |
| One to three times a month       | 0.38       | 0.18-0.83     | 0.01*          |
| Special occasions only/Never     | REF        | REF           |                |
| Physical Activity                |            |               |                |
| Ideal                            | 0.26       | 0.03-2.48     | 0.24           |
| Intermediate                     | 0.31       | 0.03-2.98     | 0.31           |
| Poor                             | REF        | REF           |                |
| Do not know/Prefer not to answer | 0.29       | 0.03-3.33     | 0.32           |
| Diet                             |            |               |                |
| Ideal                            | 1.98       | 0.05-85.14    | 0.72           |
| Intermediate                     | 1.03       | 0.72-1.46     | 0.87           |
| Poor                             | REF        | REF           |                |
| Tobacco Use                      |            |               |                |
| Ideal                            | 0.83       | 0.41-1.65     | 0.59           |
| Intermediate                     | 0.69       | 0.33-1.42     | 0.31           |
| Poor                             | REF        | REF           |                |
| Do not know/Prefer not to answer | 2.78       | 0.26-29.68    | 0.40           |
| Body Mass Index (BMI)            |            |               |                |

|              |      |           |          |
|--------------|------|-----------|----------|
| Ideal        | 0.18 | 0.09-0.37 | <0.001** |
| Intermediate | 0.47 | 0.32-0.68 | <0.001** |
| Poor         | REF  | REF       |          |

---

# Model was adjusted for baseline age, sex, race/ethnicity, education, employment status, urban/rural residence, family history of CVD, depression status, alcohol frequency intake, physical activity, diet, tobacco use, and body mass index.

BP=blood pressure, REF=reference category, OR=odds ratio, CI=confidence interval

\*  $p < 0.05$ , \*\*  $p < 0.01$

**Table S4. Relationship between shift work and the odds of new BP medication use at 5YFU among adequate sleepers (N=6,777).**

| <i>Variable</i>                  | <i>OR<sup>‡</sup></i> | <i>95% CI</i> | <i>P-value</i> |
|----------------------------------|-----------------------|---------------|----------------|
| Shift Work                       |                       |               |                |
| Shift Work                       | 0.82                  | 0.54-1.25     | 0.35           |
| No Shift Work                    | REF                   | REF           | REF            |
| Age (years)                      | 1.06                  | 1.04-1.08     | <0.001**       |
| Sex                              |                       |               |                |
| Female                           | REF                   | REF           |                |
| Male                             | 1.99                  | 1.61-2.45     | <0.001**       |
| Race/Ethnicity                   |                       |               |                |
| Mixed/Other                      | 1.02                  | 0.27-3.85     | 0.98           |
| Asian                            | 1.91                  | 0.69-5.27     | 0.21           |
| Black                            | 4.34                  | 1.30-14.46    | 0.02*          |
| White                            | REF                   | REF           |                |
| Education                        |                       |               |                |
| Attended College                 | 0.79                  | 0.64-0.96     | 0.02*          |
| No College                       | REF                   | REF           |                |
| Employment Status                |                       |               |                |
| Employed                         | 0.96                  | 0.56-1.64     | 0.88           |
| Retired                          | 0.97                  | 0.55-1.69     | 0.91           |
| Not Employed/Not Retired         | REF                   | REF           |                |
| Residence                        |                       |               |                |
| Urban                            | REF                   | REF           |                |
| Rural                            | 0.95                  | 0.72-1.26     | 0.73           |
| Family History of CVD            |                       |               |                |
| Yes                              | 1.38                  | 1.13-1.69     | 0.002**        |
| No                               | REF                   | REF           |                |
| Do not know/Prefer not to answer | 2.58                  | 0.72-9.20     | 0.14           |
| Depression Status                |                       |               |                |
| Yes                              | 1.82                  | 1.06-3.11     | 0.03*          |
| No                               | REF                   | REF           |                |
| Unknown                          | 1.62                  | 1.18-2.24     | 0.003*         |
| Alcohol Frequency Intake         |                       |               |                |
| Daily or almost daily            | 0.84                  | 0.59-1.18     | 0.32           |
| Three or four times a week       | 0.88                  | 0.63-1.22     | 0.44           |
| Once or twice a week             | 0.74                  | 0.52-1.04     | 0.08           |
| One to three times a month       | 0.91                  | 0.60-1.37     | 0.64           |
| Special occasions only/Never     | REF                   | REF           |                |
| Physical Activity                |                       |               |                |
| Ideal                            | 1.05                  | 0.03-34.25    | 0.98           |
| Intermediate                     | 1.24                  | 0.04-40.64    | 0.90           |
| Poor                             | REF                   | REF           |                |
| Do not know/Prefer not to answer | 1.00                  | 0.03-35.13    | 0.99           |
| Diet                             |                       |               |                |
| Ideal                            | 4.11                  | 0.59-28.59    | 0.15           |
| Intermediate                     | 0.99                  | 0.82-1.21     | 0.94           |
| Poor                             | REF                   | REF           |                |
| Tobacco Use                      |                       |               |                |
| Ideal                            | 0.68                  | 0.46-1.02     | 0.06           |
| Intermediate                     | 0.86                  | 0.57-1.29     | 0.46           |
| Poor                             | REF                   | REF           |                |
| Do not know/Prefer not to answer | 0.42                  | 0.02-9.95     | 0.59           |
| Body Mass Index (BMI)            |                       |               |                |



|              |      |           |          |
|--------------|------|-----------|----------|
| Ideal        | 0.36 | 0.26-0.50 | <0.001** |
| Intermediate | 0.55 | 0.44-0.67 | <0.001** |
| Poor         | REF  | REF       |          |

---

# Model was adjusted for baseline age, sex, race/ethnicity, education, employment status, urban/rural residence, family history of CVD, depression status, alcohol frequency intake, physical activity, diet, tobacco use, and body mass index.

BP=blood pressure, REF=reference category, OR=odds ratio, CI=confidence interval

\*  $p < 0.05$ , \*\*  $p < 0.01$

**Table S5. Relationship between shift work and the odds of new BP medication use at 5YFU among long sleepers (N=524).**

| <i>Variable</i>                  | <i>OR<sup>‡</sup></i> | <i>95% CI</i> | <i>P-value</i> |
|----------------------------------|-----------------------|---------------|----------------|
| Shift Work                       |                       |               |                |
| Shift Work                       | 0.64                  | 0.11-3.54     | 0.60           |
| No Shift Work                    | REF                   | REF           | REF            |
| Age (years)                      | 1.08                  | 1.00-1.15     | 0.04*          |
| Sex                              |                       |               |                |
| Female                           | REF                   | REF           |                |
| Male                             | 1.71                  | 0.80-3.66     | 0.17           |
| Race/Ethnicity                   |                       |               |                |
| Mixed/Other                      | 2.53                  | 0.11-59.29    | 0.56           |
| Asian                            | 1.64                  | 0.04-72.18    | 0.80           |
| White                            | REF                   | REF           |                |
| Education                        |                       |               |                |
| Attended College                 | 0.36                  | 0.16-0.81     | 0.01*          |
| No College                       | REF                   | REF           |                |
| Employment Status                |                       |               |                |
| Employed                         | 1.20                  | 0.35-4.11     | 0.78           |
| Retired                          | 0.46                  | 0.12-1.81     | 0.27           |
| Not Employed/Not Retired         | REF                   | REF           |                |
| Residence                        |                       |               |                |
| Urban                            | REF                   | REF           |                |
| Rural                            | 1.62                  | 0.65-4.07     | 0.30           |
| Family History of CVD            |                       |               |                |
| Yes                              | 0.77                  | 0.38-1.56     | 0.46           |
| No                               | REF                   | REF           |                |
| Depression Status                |                       |               |                |
| Yes                              | 1.13                  | 0.26-4.86     | 0.87           |
| No                               | REF                   | REF           |                |
| Unknown                          | 0.85                  | 0.31-2.34     | 0.75           |
| Alcohol Frequency Intake         |                       |               |                |
| Daily or almost daily            | 0.87                  | 0.29-2.60     | 0.81           |
| Three or four times a week       | 0.50                  | 0.16-1.55     | 0.23           |
| Once or twice a week             | 0.52                  | 0.17-1.55     | 0.24           |
| One to three times a month       | 0.41                  | 0.10-1.71     | 0.22           |
| Special occasions only/Never     | REF                   | REF           |                |
| Physical Activity                |                       |               |                |
| Ideal                            | 1.40                  | 0.65-3.03     | 0.39           |
| Intermediate                     | REF                   | REF           |                |
| Do not know/Prefer not to answer | 0.52                  | 0.03-10.70    | 0.67           |
| Diet                             |                       |               |                |
| Intermediate                     | 1.38                  | 0.67-2.85     | 0.39           |
| Poor                             | REF                   | REF           |                |
| Tobacco Use                      |                       |               |                |
| Ideal                            | 2.20                  | 0.43-11.30    | 0.34           |
| Intermediate                     | 0.77                  | 0.13-4.55     | 0.77           |
| Poor                             | REF                   | REF           |                |
| Do not know/Prefer not to answer |                       |               |                |
| Body Mass Index (BMI)            |                       |               |                |
| Ideal                            | 0.09                  | 0.02-0.41     | 0.002**        |
| Intermediate                     | 0.24                  | 0.11-0.55     | 0.001**        |
| Poor                             | REF                   | REF           |                |

<sup>‡</sup> Model was adjusted for baseline age, sex, race/ethnicity, education, employment status, urban/rural residence, family history of CVD, depression status, alcohol frequency intake, physical activity, diet, tobacco use, and body mass index. BP=blood pressure, REF=reference category, OR=odds ratio, CI=confidence interval \*  $p < 0.05$ , \*\*  $p < 0.01$

**Table S6. Relationship between shift work and the odds of new BP medication use at 5YFU among morning types (N=2,359).**

| <i>Variable</i>          |                                  | <i>OR<sup>†</sup></i> | <i>95% CI</i> | <i>P-value</i> |
|--------------------------|----------------------------------|-----------------------|---------------|----------------|
| Shift Work               |                                  |                       |               |                |
|                          | Shift Work                       | 1.53                  | 0.88-2.67     | 0.14           |
|                          | No Shift Work                    | REF                   | REF           |                |
| Age (years)              |                                  | 1.04                  | 1.01-1.07     | 0.02*          |
| Sex                      |                                  |                       |               |                |
|                          | Female                           | REF                   | REF           |                |
|                          | Male                             | 1.80                  | 1.28-2.53     | 0.001**        |
| Race/Ethnicity           |                                  |                       |               |                |
|                          | Mixed/Other                      | 0.77                  | 0.04-13.63    | 0.86           |
|                          | Asian                            | 1.85                  | 0.47-7.33     | 0.69           |
|                          | Black                            | 2.47                  | 0.12-53.26    | 0.55           |
|                          | White                            | REF                   | REF           |                |
| Education                |                                  |                       |               |                |
|                          | Attended College                 | 0.59                  | 0.42-0.83     | 0.002**        |
|                          | No College                       | REF                   | REF           |                |
| Employment Status        |                                  |                       |               |                |
|                          | Employed                         | 2.13                  | 0.73-6.24     | 0.25           |
|                          | Retired                          | 2.24                  | 0.74-6.75     | 0.15           |
|                          | Not Employed/Not Retired         | REF                   | REF           |                |
| Residence                |                                  |                       |               |                |
|                          | Urban                            | REF                   | REF           |                |
|                          | Rural                            | 1.10                  | 0.70-1.71     | 0.69           |
| Family History of CVD    |                                  |                       |               |                |
|                          | Yes                              | 2.03                  | 1.44-2.88     | <0.001**       |
|                          | No                               | REF                   | REF           |                |
|                          | Do not know/Prefer not to answer | 0.57                  | 0.03-11.61    | 0.55           |
| Depression Status        |                                  |                       |               |                |
|                          | Yes                              | 1.95                  | 0.89-4.28     | 0.10           |
|                          | No                               | REF                   | REF           |                |
|                          | Unknown                          | 1.35                  | 0.81-2.26     | 0.88           |
| Alcohol Frequency Intake |                                  |                       |               |                |
|                          | Daily or almost daily            | 0.87                  | 0.52-1.47     | 0.53           |
|                          | Three or four times a week       | 0.89                  | 0.54-1.46     | 0.32           |
|                          | Once or twice a week             | 0.46                  | 0.26-0.80     | 0.008**        |
|                          | One to three times a month       | 0.85                  | 0.45-1.61     | 0.61           |
|                          | Special occasions only/Never     | REF                   | REF           |                |
| Physical Activity        |                                  |                       |               |                |
|                          | Ideal                            | 1.63                  | 0.03-79.38    | 0.87           |
|                          | Intermediate                     | 1.91                  | 0.04-93.35    | 0.75           |
|                          | Poor                             | REF                   | REF           |                |
|                          | Do not know/Prefer not to answer | 1.19                  | 0.02-66.74    | 0.81           |
| Diet                     |                                  |                       |               |                |
|                          | Ideal                            | 4.11                  | 0.43-39.34    | 0.21           |
|                          | Intermediate                     | 0.97                  | 0.70-1.34     | 0.84           |
|                          | Poor                             | REF                   | REF           |                |
| Tobacco Use              |                                  |                       |               |                |
|                          | Ideal                            | 1.01                  | 0.44-2.31     | 0.48           |
|                          | Intermediate                     | 1.43                  | 0.62-3.33     | 0.40           |
|                          | Poor                             | REF                   | REF           |                |
|                          | Do not know/Prefer not to answer | 6.75                  | 0.44-104.42   | 0.18           |
| Body Mass Index (BMI)    |                                  |                       |               |                |

|              |      |           |         |
|--------------|------|-----------|---------|
| Ideal        | 0.43 | 0.26-0.71 | 0.01*   |
| Intermediate | 0.61 | 0.43-0.87 | 0.006** |
| Poor         | REF  | REF       |         |

---

‡ Model was adjusted for baseline age, sex, race/ethnicity, education, employment status, urban/rural residence, family history of CVD, depression status, alcohol frequency intake, physical activity, diet, tobacco use, and body mass index.

BP=blood pressure, REF=reference category, OR=odds ratio, CI=confidence interval

\*  $p < 0.05$ , \*\*  $p < 0.01$

**Table S7. Relationship between shift work and the odds of new BP medication use at 5YFU among intermediate types (N=6,004).**

| <i>Variable</i>                  | <i>OR#</i> | <i>95% CI</i> | <i>P-value</i> |
|----------------------------------|------------|---------------|----------------|
| Shift Work                       |            |               |                |
| Shift Work                       | 0.83       | 0.53-1.29     | 0.40           |
| No Shift Work                    | REF        | REF           | REF            |
| Age (years)                      | 1.07       | 1.05-1.09     | <0.001**       |
| Sex                              |            |               |                |
| Female                           | REF        | REF           |                |
| Male                             | 1.97       | 1.58-2.46     | <0.001**       |
| Race/Ethnicity                   |            |               |                |
| Mixed/Other                      | 1.69       | 0.61-4.66     | 0.31           |
| Asian                            | 1.52       | 0.49-4.76     | 0.47           |
| Black                            | 4.00       | 1.34-11.91    | 0.01*          |
| White                            | REF        | REF           |                |
| Education                        |            |               |                |
| Attended College                 | 0.89       | 0.72-1.10     | 0.29           |
| No College                       | REF        | REF           |                |
| Employment Status                |            |               |                |
| Employed                         | 0.78       | 0.47-1.32     | 0.36           |
| Retired                          | 0.68       | 0.40-1.18     | 0.17           |
| Not Employed/Not Retired         | REF        | REF           |                |
| Residence                        |            |               |                |
| Urban                            | REF        | REF           |                |
| Rural                            | 0.85       | 0.62-1.16     | 0.30           |
| Family History of CVD            |            |               |                |
| Yes                              | 1.16       | 0.94-1.44     | 0.17           |
| No                               | REF        | REF           |                |
| Do not know/Prefer not to answer | 4.18       | 1.27-13.71    | 0.02*          |
| Depression Status                |            |               |                |
| Yes                              | 1.66       | 0.94-2.94     | 0.08           |
| No                               | REF        | REF           |                |
| Unknown                          | 1.60       | 1.14-2.24     | 0.006**        |
| Alcohol Frequency Intake         |            |               |                |
| Daily or almost daily            | 0.80       | 0.55-1.16     | 0.23           |
| Three or four times a week       | 0.71       | 0.49-1.02     | 0.06           |
| Once or twice a week             | 0.73       | 0.51-1.05     | 0.09           |
| One to three times a month       | 0.58       | 0.36-0.92     | 0.02*          |
| Special occasions only/Never     | REF        | REF           |                |
| Physical Activity                |            |               |                |
| Ideal                            | 0.20       | 0.03-1.59     | 0.13           |
| Intermediate                     | 0.23       | 0.03-1.84     | 0.17           |
| Poor                             | REF        | REF           |                |
| Do not know/Prefer not to answer | 0.19       | 0.02-1.73     | 0.14           |
| Diet                             |            |               |                |
| Ideal                            | 3.52       | 0.12-100.50   | 0.46           |
| Intermediate                     | 1.03       | 0.84-1.27     | 0.78           |
| Poor                             | REF        | REF           |                |
| Tobacco Use                      |            |               |                |
| Ideal                            | 0.67       | 0.44-1.02     | 0.06           |
| Intermediate                     | 0.72       | 0.46-1.11     | 0.14           |
| Poor                             | REF        | REF           |                |
| Do not know/Prefer not to answer | 0.47       | 0.02-10.34    | 0.63           |
| Body Mass Index (BMI)            |            |               |                |

|              |      |           |          |
|--------------|------|-----------|----------|
| Ideal        | 0.30 | 0.21-0.43 | <0.001** |
| Intermediate | 0.50 | 0.40-0.63 | <0.001** |
| Poor         | REF  | REF       |          |

---

# Model was adjusted for baseline age, sex, race/ethnicity, education, employment status, urban/rural residence, family history of CVD, depression status, alcohol frequency intake, physical activity, diet, tobacco use, and body mass index.

BP=blood pressure, REF=reference category, OR=odds ratio, CI=confidence interval

\*  $p < 0.05$ , \*\*  $p < 0.01$

**Table S8. Relationship between shift work and the odds of new BP medication use at 5YFU among evening types (N=837).**

| <i>Variable</i>          |                                  | <i>OR<sup>‡</sup></i> | <i>95% CI</i> | <i>P-value</i> |
|--------------------------|----------------------------------|-----------------------|---------------|----------------|
| Shift Work               |                                  |                       |               |                |
|                          | Shift Work                       | 1.21                  | 0.49-2.96     | 0.68           |
|                          | No Shift Work                    | REF                   | REF           | REF            |
| Age (years)              |                                  | 1.06                  | 1.01-1.11     | 0.01*          |
| Sex                      |                                  |                       |               |                |
|                          | Female                           | REF                   | REF           |                |
|                          | Male                             | 1.85                  | 1.06-3.24     | 0.03*          |
| Race/Ethnicity           |                                  |                       |               |                |
|                          | Mixed/Other                      | 0.83                  | 0.04-19.58    | 0.91           |
|                          | Asian                            | 1.83                  | 0.23-14.57    | 0.57           |
|                          | Black                            | 1.95                  | 0.03-125.23   | 0.75           |
|                          | White                            | REF                   | REF           |                |
| Education                |                                  |                       |               |                |
|                          | Attended College                 | 1.10                  | 0.64-1.90     | 0.73           |
|                          | No College                       | REF                   | REF           |                |
| Employment Status        |                                  |                       |               |                |
|                          | Employed                         | 0.74                  | 0.26-2.11     | 0.57           |
|                          | Retired                          | 0.69                  | 0.20-2.31     | 0.54           |
|                          | Not Employed/Not Retired         | REF                   | REF           |                |
| Residence                |                                  |                       |               |                |
|                          | Urban                            | REF                   | REF           |                |
|                          | Rural                            | 0.81                  | 0.36-1.80     | 0.60           |
| Family History of CVD    |                                  |                       |               |                |
|                          | Yes                              | 0.69                  | 0.41-1.18     | 0.18           |
|                          | No                               | REF                   | REF           |                |
|                          | Do not know/Prefer not to answer | 1.02                  | 0.02-60.94    | 0.99           |
| Depression Status        |                                  |                       |               |                |
|                          | Yes                              | 1.08                  | 0.24-4.91     | 0.92           |
|                          | No                               | REF                   | REF           |                |
|                          | Unknown                          | 1.22                  | 0.53-2.80     | 0.64           |
| Alcohol Frequency Intake |                                  |                       |               |                |
|                          | Daily or almost daily            | 0.95                  | 0.39-2.32     | 0.92           |
|                          | Three or four times a week       | 0.74                  | 0.31-1.77     | 0.50           |
|                          | Once or twice a week             | 0.60                  | 0.24-1.52     | 0.28           |
|                          | One to three times a month       | 1.30                  | 0.50-3.39     | 0.59           |
|                          | Special occasions only/Never     | REF                   | REF           |                |
| Physical Activity        |                                  |                       |               |                |
|                          | Ideal                            | 0.84                  | 0.49-1.44     | 0.52           |
|                          | Poor                             | REF                   | REF           |                |
|                          | Do not know/Prefer not to answer | 1.44                  | 0.33-6.25     | 0.63           |
| Diet                     |                                  |                       |               |                |
|                          | Ideal                            | 1.27                  | 0.03-63.27    | 0.91           |
|                          | Intermediate                     | 0.96                  | 0.57-1.64     | 0.89           |
|                          | Poor                             | REF                   | REF           |                |
| Tobacco Use              |                                  |                       |               |                |
|                          | Ideal                            | 1.22                  | 0.52-2.89     | 0.64           |
|                          | Intermediate                     | 0.64                  | 0.26-1.60     | 0.34           |
|                          | Poor                             | REF                   | REF           |                |
| Body Mass Index (BMI)    |                                  |                       |               |                |
|                          | Ideal                            | 0.03                  | 0.002-0.35    | 0.005**        |
|                          | Intermediate                     | 0.36                  | 0.21-0.64     | <0.001**       |
|                          | Poor                             | REF                   | REF           |                |

---

# Model was adjusted for baseline age, sex, race/ethnicity, education, employment status, urban/rural residence, family history of CVD, depression status, alcohol frequency intake, physical activity, diet, tobacco use, and body mass index.  
BP=blood pressure, REF=reference category, OR=odds ratio, CI=confidence interval  
\*  $p < 0.05$ , \*\*  $p < 0.01$
